# Supplementary material
Source: HighWire-hosted journal article supplement (https://erj.ersjournals.com/content/49/5/1700387)
Supplement: inline-supplementary-material-1 [file inline-supplementary-material-1.pdf]

**Online supplementary table S1. Proportion of cases treated with bedaquiline per country/state during the study period out of 428 confirmed MDR-/XDR TB cases.**

| Country                       | Number of sites | Cases included in the present study, <i>n</i> (% of the total cases; n=428)     | Proportion of cases treated with BDQ during the study period out of the total cases in the same Country/State (%) | MDR-TB, <i>n</i> (%) (n=233) | XDR-TB <i>n</i> (%) (n=195) | Known outcome <i>n</i> (%) (n=247) |
|-------------------------------|-----------------|---------------------------------------------------------------------------------|-------------------------------------------------------------------------------------------------------------------|------------------------------|-----------------------------|------------------------------------|
| Argentina                     | 1               | 1 (0.2)                                                                         | 100%                                                                                                              | -                            | 1 (0.5)                     | 1 (0.4)                            |
| Australia (State of Victoria) | 1               | 4 (0.9)                                                                         | 100%                                                                                                              | 2 (0.9)                      | 2 (1.0)                     | 1 (0.4)                            |
| Belarus                       | 2               | 30 (7.0)                                                                        | 16.1%                                                                                                             | 9 (3.9)                      | 21 (10.8)                   | -                                  |
| Belgium                       | 1               | 7 (1.6)                                                                         | 53.8%                                                                                                             | 6 (2.6)                      | 1 (0.5)                     | 2 (0.8)                            |
| Greece                        | 2               | 2 (0.5)                                                                         | 100%                                                                                                              | -                            | 2 (1.0)                     | 2 (0.8)                            |
| India                         | 2               | 21 (4.9)                                                                        | 40.4%                                                                                                             | 8 (3.4)                      | 13 (6.7)                    | 17 (6.9)                           |
| Italy                         | 4               | 26 (6.1)                                                                        | 66.7%                                                                                                             | 17 (7.3)                     | 9 (4.6)                     | 9 (3.6)                            |
| Netherlands                   | 1               | 5 (1.2)                                                                         | 71.4%                                                                                                             | 3 (1.3)                      | 2 (1.0)                     | 3 (1.2)                            |
| Peru                          | 1               | 15 (3.5)                                                                        | 100%                                                                                                              | 15 (6.4)                     | -                           | 10 (4.1)                           |
| Portugal                      | 1               | 1 (0.2)                                                                         | 50%                                                                                                               | -                            | 1 (0.5)                     | 1 (0.4)                            |
| Russian Federation            | 2               | 120 (28.0) of whom:<br>- Moscow City 90 (21.0)<br>- Arkhangelsk Oblast 30 (7.0) | 8.8% of whom:<br>- Moscow City 38.1%<br>- Arkhangelsk Oblast 100%                                                 | 53 (22.8)                    | 67 (34.4)                   | 85 (34.4)                          |
| South Africa                  | 3               | 190 (44.4)                                                                      | 11.6%                                                                                                             | 117 (50.2)                   | 73 (37.4)                   | 113 (45.8)                         |
| Spain                         | 2               | 2 (0.5)                                                                         | 100%                                                                                                              | 2 (0.9)                      | -                           | -                                  |
| Sweden                        | 1               | 3 (0.7)                                                                         | 27.3%                                                                                                             | 1 (0.4)                      | 2 (1.0)                     | 3 (1.2)                            |
| United Kingdom                | 1               | 1 (0.2)                                                                         | 7.7%                                                                                                              | -                            | 1 (0.5)                     | -                                  |

MDR-TB: multidrug-resistant tuberculosis; XDR-TB: extensively drug-resistant tuberculosis; Bdq: bedaquiline
